# Supplementary material for: Modes of adhesion of two Janus nanoparticles on the outer or inner side of lipid vesicles
Source: Royal Society of Chemistry journal article supplement (doi:10.1039/d2sm00306f), 2022-01-01
Supplement: d2sm00306f1.pdf [file d2sm00306f1.pdf]

## Electronic Supplementary Information: Modes of Adhesion of Two Janus Nanoparticles Adsorbed on the Outer and Inner Sides of Lipid Vesicles

Yu Zhu, Abash Sharma, Eric J. Spangler, and Mohamed Laradji  
*Department of Physics and Materials Science, The University of Memphis, Memphis, TN 38152, USA*

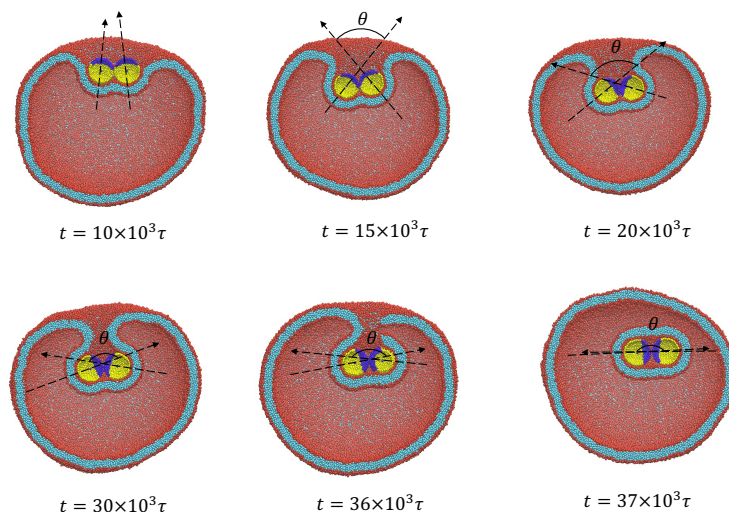

Figure S1: Time series of snapshots of a dimer of Janus NPs undergoing endocytosis at  $J = 0.7$  and  $\xi = 3.94k_B T/\text{nm}^2$ . These snapshots show a reduction of the size of the neck during the endocytosis process, accompanied by an increased antialignment of the principal axes of the two NPs.

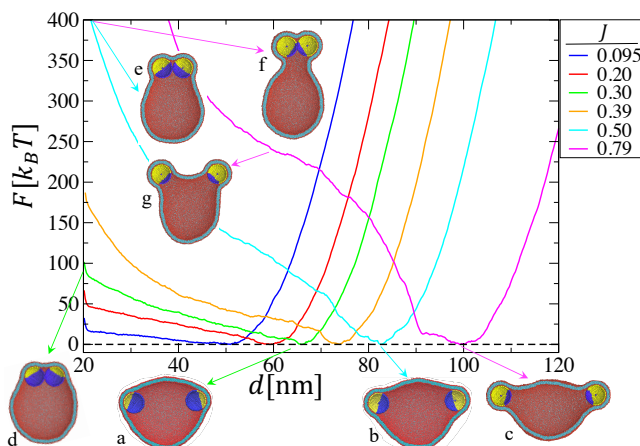

Figure S2: Free energy versus distance between two 20-nm NPs, adhering to the inner side the vesicle, for different values of  $J$  at  $\xi = 4.33k_B T/\text{nm}^2$ . Snapshots (a), (b) and (c) correspond to most stable states at  $J = 0.30, 0.50$  and  $0.79$ , respectively. Snapshots (d), (e), and (f) correspond to the dimeric state ( $d = 11$  nm) for  $J = 0.30, 0.50$  , and  $0.79$ , respectively. Snapshot (g) is for  $J = 0.79$  at  $d = 60$  nm.

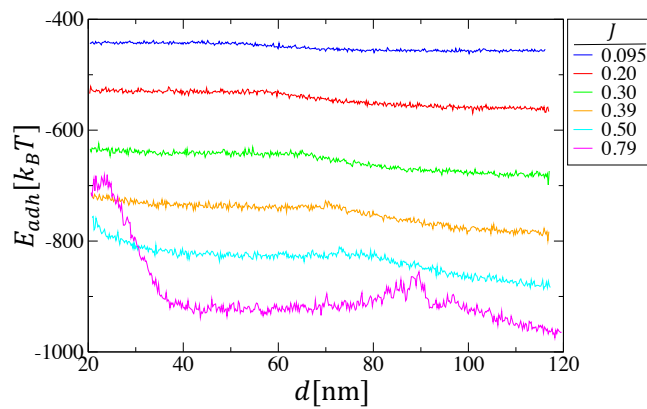

Figure S3: Net adhesion energy of two 20-nm Janus NPs, adhering to the inner side of the vesicle at  $\xi = 1.57k_B T/\text{nm}^2$ , as a function of the distance between them. Graphs for  $J = 0.20, 0.30, 0.39, 0.50,$  and  $0.79$  were translated upward by 350, 750, 1200, 1700, and 2900 $k_B T$ , respectively.
